# Supplementary material
Source: Springer Nature journal article supplement (https://www.springermedizin.de/resource/supplementary/12916_2012_712_MOESM1_ESM.pdf/9598728)

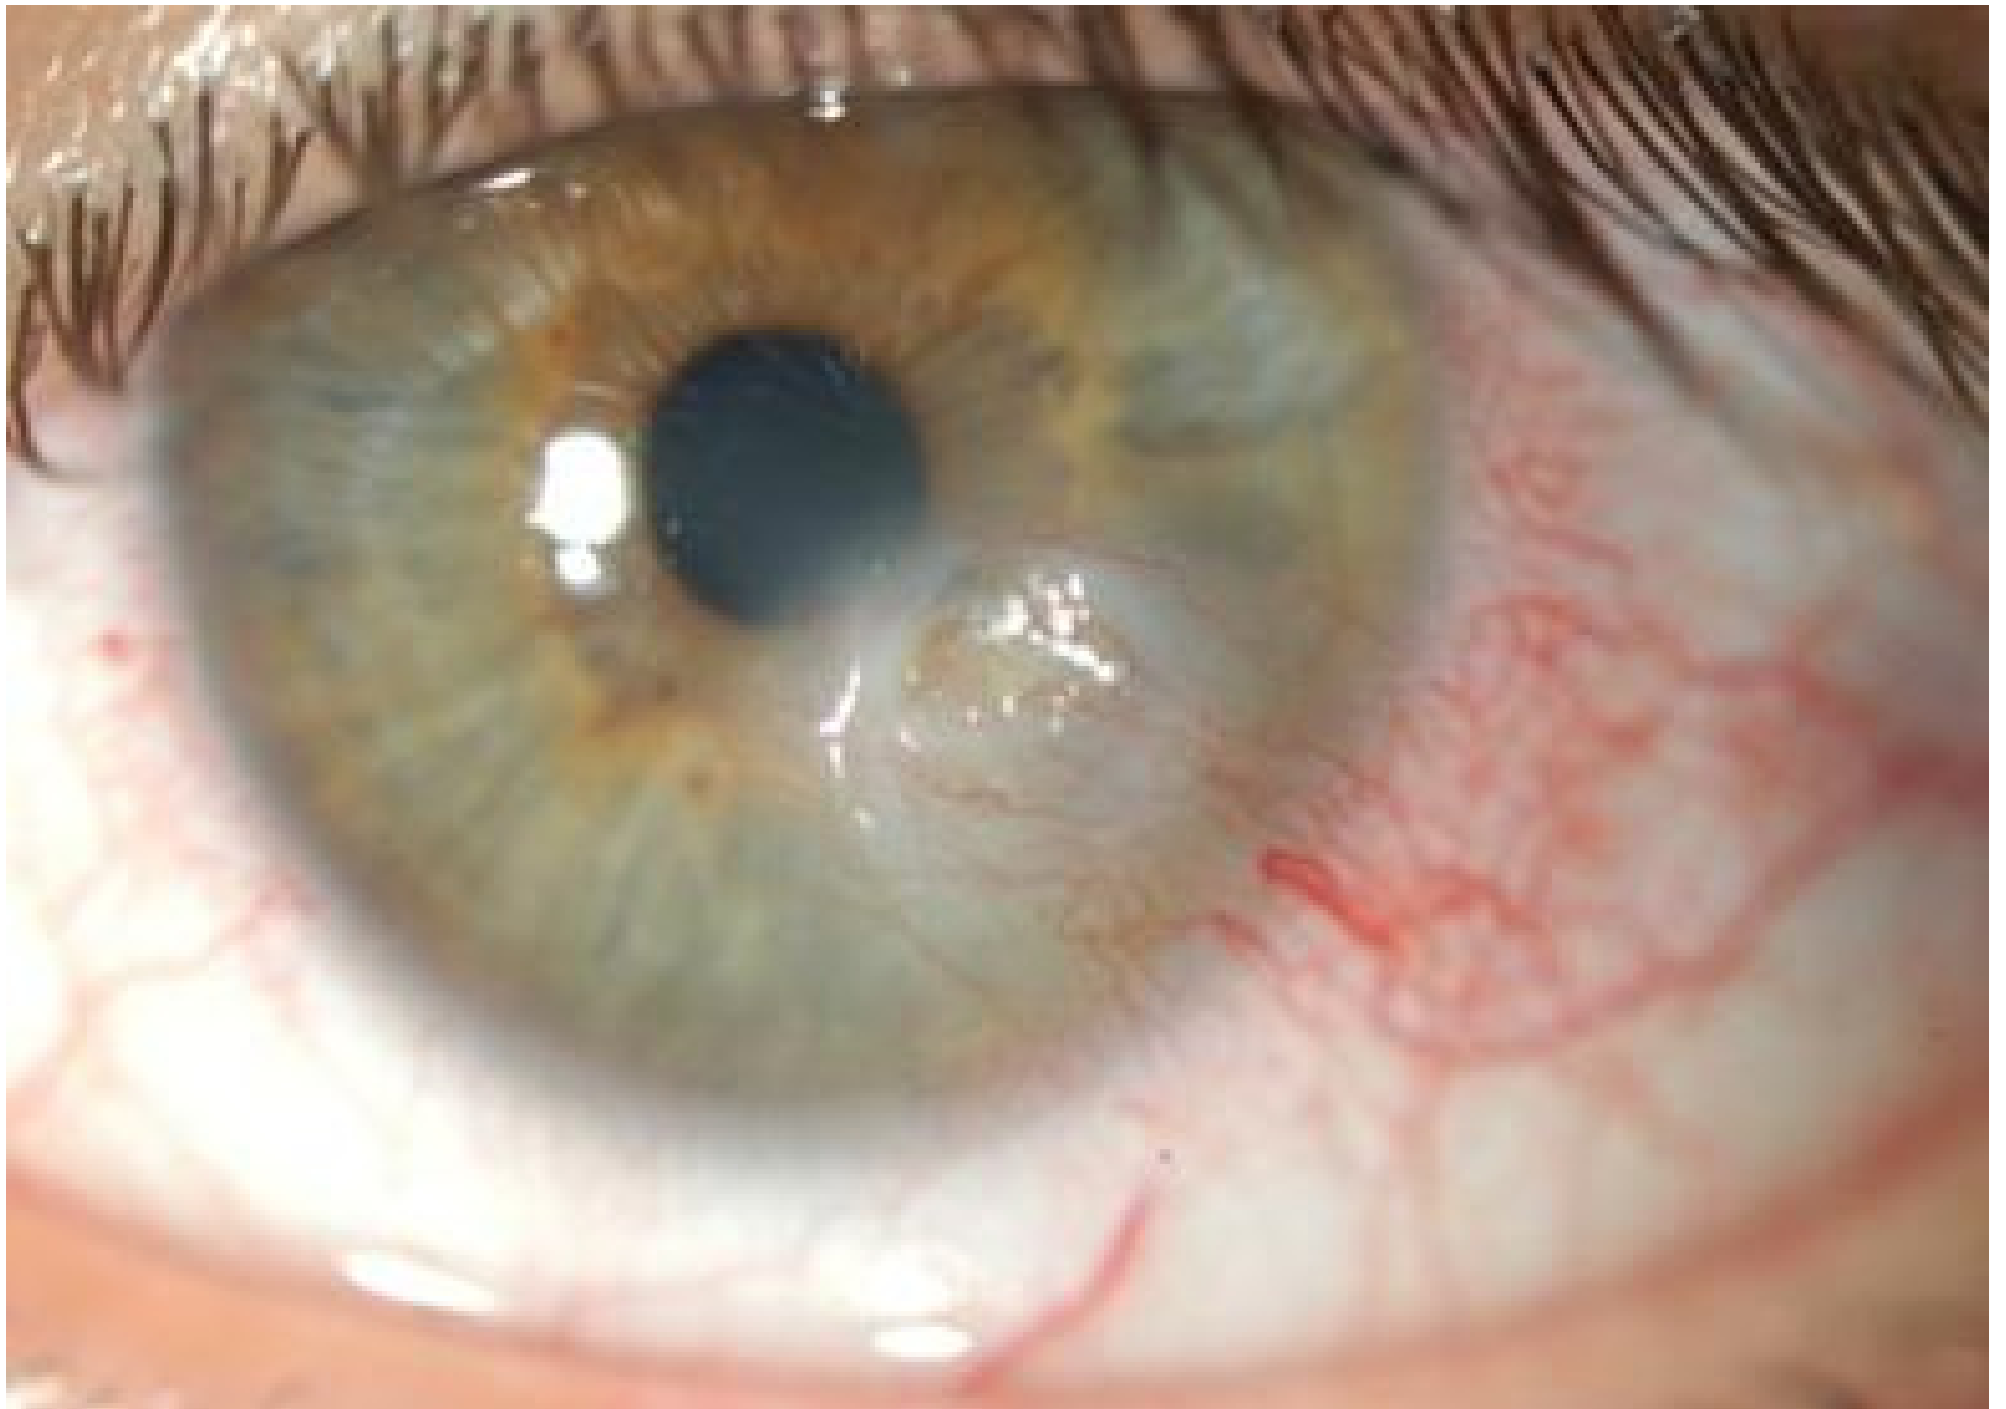

Supplement: MOESM1 [file 9598728]
